# Supplementary material for: Bubble pump: scalable strategy for in-plane liquid routing
Source: Royal Society of Chemistry journal article supplement (doi:10.1039/c5lc00326a), 2015-01-01
Supplement: c5lc00326a1.pdf [file c5lc00326a1.pdf]

Supplementary Material for

## Bubble pump: Strategy for in-plane liquid routing

Ali Oskooei, and Axel Guenther

### Supplementary Video Captions

**Supplementary Movie 1.** Video showing the bubble pump in operation with working fluids of ethanol and air. With the following operational conditions:

$$\begin{aligned}T_{act} &= 500\text{ms} \\ T_{wd} &= 500\text{ms} \\ P_{act} &= 0.25\text{ psi} \\ P_{wd} &= 0\text{ psi} \\ P_{ps} &= 0.1\text{ psi}\end{aligned}$$

**Supplementary Movie 2.** Video showing the bubble pump in operation with working fluids of mineral oil and air. With the following operational conditions:

$$\begin{aligned}T_{act} &= 1500\text{ms} \\ T_{wd} &= 1500\text{ms} \\ P_{act} &= 0.3\text{ psi} \\ P_{wd} &= 0\text{ psi} \\ P_{ps} &= 0.15\text{ psi}\end{aligned}$$

**Supplementary Movie 3.** Video showing the bubble pump in operation with working fluids of culture medium and air. The gas and liquid channel dimensions were reduced to prevent foaming of the culture medium. The bubble pump is operating with the following operational conditions:

$$\begin{aligned}T_{act} &= 500\text{ms} \\ T_{wd} &= 900\text{ms} \\ P_{act} &= 0.55\text{ psi} \\ P_{wd} &= 0.17\text{ psi} \\ P_{ps} &= 0.45\text{ psi}\end{aligned}$$

**Supplementary Movie 4.** Video showing two bubble pumps operating in parallel with working fluids of mineral oil and air. The parallel configuration was devised to enhance the flowrate output. Both bubble pumps operating in parallel with the following conditions:

$$\begin{aligned}T_{act} &= 500\text{ms} \\ T_{wd} &= 1000\text{ms}\end{aligned}$$

$$P_{act} = 0.3 \text{ psi}$$
$$P_{wd} = 0 \text{ psi}$$
$$P_{ps} = 0.15 \text{ psi}$$

**Supplementary Movie 5.** Video showing a scaled-up device with twelve independent liquid lines each equipped with a bubble pump which drives the working liquid of mineral oil from the inlet well towards the outlet. All twelve bubble pumps operate under the following conditions:

$$T_{act} = 1000 \text{ ms}$$
$$T_{wd} = 1000 \text{ ms}$$
$$P_{act} = 0.3 \text{ psi}$$
$$P_{wd} = 0 \text{ psi}$$
$$P_{ps} = 0.16 \text{ psi}$$
